# Supplementary material for: 11C-acetate PET/CT in pre-therapeutic lymph node staging in high-risk prostate cancer patients and its influence on disease management - a retrospective study
Source: Springer Nature journal article supplement (doi:10.1186/s13550-014-0055-1), 2014-10-08

| Patient number | Localisation pelvic LN metastases        | Localisation distant metastases   | Synchronous finding    | Curative → additional RT | Curative → non-curative RT  |
|----------------|------------------------------------------|-----------------------------------|------------------------|--------------------------|-----------------------------|
| 1              | Iliac int/ext                            | Paraaortal LN                     | -                      | -                        | Palliative RT               |
| 2              | Iliac ext                                | Skeletal                          | -                      | -                        | No RT                       |
| 3              | Iliac int/ext                            | -                                 | -                      | RT boost 16 Gy           | -                           |
| 4              | Iliac int/ext                            | -                                 | -                      | RT boost 16 Gy           | -                           |
| 5              | Iliac ext                                | -                                 | -                      | RT boost 16 Gy           | -                           |
| 6              | Iliac com                                | -                                 | -                      | RT boost 16 Gy           | -                           |
| 7              | Iliac int/ext                            | -                                 | -                      | RT boost 16 Gy           | -                           |
| 8              | Obt, iliac int/ext/com                   | -                                 | -                      | RT boost 15 Gy           | -                           |
| 9              | -                                        | -                                 | HCC with paraaortal LN | -                        | No RT                       |
| 10             | Iliac ext                                | -                                 | -                      | RT boost 20 Gy           | -                           |
| 11             | Obt, iliac int/ext/com                   | Paraaortal LN, skeletal           | -                      | -                        | No RT                       |
| 12             | Pararectal, iliac ext                    | -                                 | -                      | RT boost 26 Gy           | -                           |
| 13             | Pararectal, obt, iliac int/ext/com       | Paraaortal LN                     | -                      | -                        | Palliative RT               |
| 14             | Iliac int/ext/com                        | Paraaortal, thoracic, cervical LN | -                      | -                        | No RT                       |
| 15             | -                                        | Skeletal                          | -                      | -                        | No RT                       |
| 16             | Iliac ext                                | -                                 | -                      | RT boost 16 Gy           | -                           |
| 17             | Iliac ext                                | Skeletal                          | -                      | -                        | No RT                       |
| 18             | -                                        | -                                 | Aortic aneurysm        | -                        | No RT                       |
| 19             | Pararectal, iliac int/ext/com            | Paraaortal, thoracic LN           | -                      | -                        | No RT                       |
| <del>20</del>  | Pararectal, obt, iliac ext <del>16</del> | <del>-8</del>                     | <del>-2</del>          | <del>-9</del>            | Palliative RT <del>10</del> |
| Σ              | 17                                       | 8                                 | 2                      | 9                        | 11                          |

Formaterad tabell

Table 5 <sup>11</sup>C -acetate PET/CT findings resulting in altered treatment strategy.

Obt = obturator. LN= lymph nodes. HCC= hepatocellular carcinoma. RT= radiotherapy.

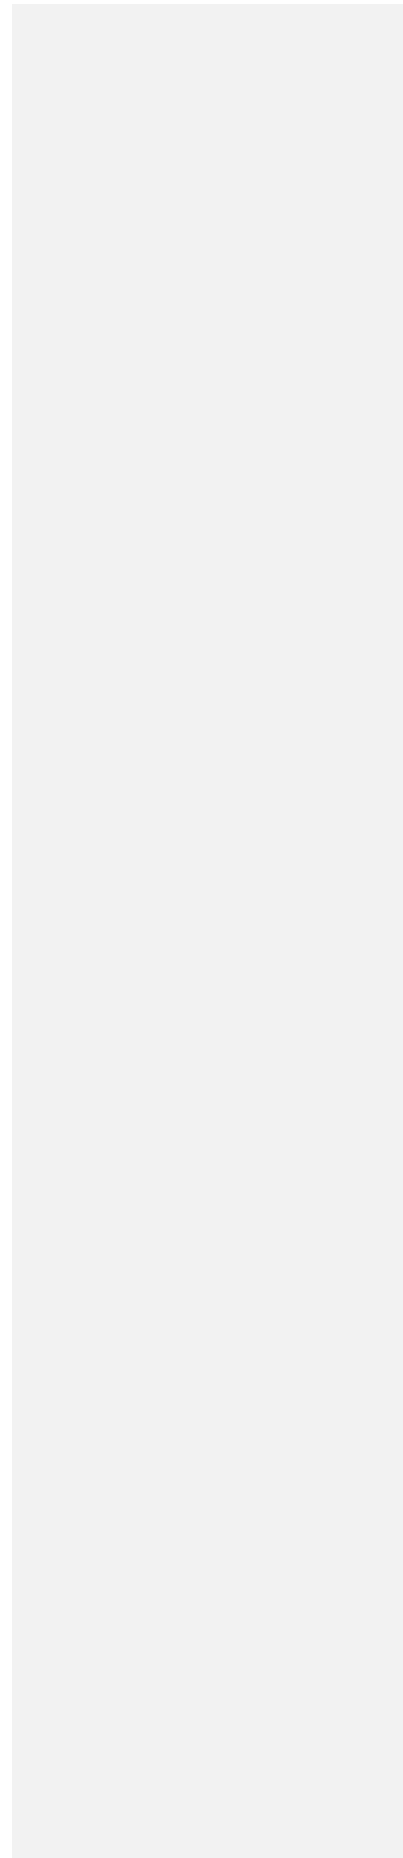

Supplement: MOESM9 [file 9786250]
