# Supplementary material for: 11C-acetate PET/CT in pre-therapeutic lymph node staging in high-risk prostate cancer patients and its influence on disease management - a retrospective study
Source: Springer Nature journal article supplement (doi:10.1186/s13550-014-0055-1), 2014-10-08
Supplement: MOESM7 [file 9786250]

| <b>Locoregional LN localisation</b> | <b>High grade susp LN met (mean SUV<sub>max</sub> g/ml and mean short axis mm)</b> | <b>Intermediate susp LN met (mean SUV<sub>max</sub> g/ml)</b> | <b>Number of patients (n=21)</b> | <b>Σ susp LN mets:</b> |
|-------------------------------------|------------------------------------------------------------------------------------|---------------------------------------------------------------|----------------------------------|------------------------|
| <b>Pararectal</b>                   | <b>6 (5.4 g/ml, 20 mm)</b>                                                         | <b>0</b>                                                      | <b>4</b>                         | <b>6</b>               |
| <b>Oburator</b>                     | <b>6 (5.2 g/ml, 9.7 mm)</b>                                                        | <b>2 (2.9 g/ml)</b>                                           | <b>6</b>                         | <b>8</b>               |
| <b>External iliac</b>               | <b>28 (6.6 g/ml, 14 mm)</b>                                                        | <b>36 (3.9 g/ml)</b>                                          | <b>15</b>                        | <b>64</b>              |
| <b>Internal iliac</b>               | <b>11 (6.5 g/ml, 14 mm)</b>                                                        | <b>4 (4.7 g/ml)</b>                                           | <b>9</b>                         | <b>15</b>              |
| <b>Common iliac</b>                 | <b>7 (4.8 g/ml, 13 mm)</b>                                                         | <b>5 (4.3 g/ml)</b>                                           | <b>6</b>                         | <b>12</b>              |
|                                     |                                                                                    |                                                               |                                  |                        |
| <b>Σ:</b>                           | <b>58</b>                                                                          | <b>47</b>                                                     | <b>21*</b>                       | <b>105</b>             |

**Table 3** Distribution of total number of intermediate and high grade suspicion locoregional lymph node uptakes, interpreted as metastatic.

\*21 patients with acetate uptakes in multiple locations.
