# Supplementary material for: 11C-acetate PET/CT in pre-therapeutic lymph node staging in high-risk prostate cancer patients and its influence on disease management - a retrospective study
Source: Springer Nature journal article supplement (doi:10.1186/s13550-014-0055-1), 2014-10-08
Supplement: MOESM8 [file 9786250]

| Localisation of suspected pathology | Number of PET + lesions                      | Number of CT + lesions           | CT appearance                | Pathology unrelated to prostate cancer | Number of patients | Σ distant mets:                        |
|-------------------------------------|----------------------------------------------|----------------------------------|------------------------------|----------------------------------------|--------------------|----------------------------------------|
| <b>Paraaortal LN</b>                | <b>6</b> (mean SUV <sub>max</sub> 5,8 g/ml)  | <b>6</b> (mean short axis 13 mm) | <b>oval - rounded shape</b>  |                                        | <b>6</b>           | <b>6</b> (4 solitary, 2 conglomerates) |
| <b>Mediastinal/hilar LN</b>         | <b>8</b> (mean SUV <sub>max</sub> 3,7 g/ml)  | <b>8</b> (mean short axis 10 mm) | <b>oval - rounded shape</b>  |                                        | <b>8</b>           | <b>8</b> (6 solitary, 2 conglomerates) |
| <b>Axillary LN</b>                  | <b>1</b> (SUV <sub>max</sub> 9,0 g/ml)       | <b>1</b> (short axis 10 mm)      | <b>rounded shape</b>         |                                        | <b>1</b>           | <b>1</b>                               |
| <b>Cervical LN</b>                  | <b>2</b> (mean SUV <sub>max</sub> 5,6 g/ml)  | <b>2</b> (mean short axis 10 mm) | <b>rounded shape</b>         |                                        | <b>1</b>           | <b>2</b> (2 conglomerates)             |
| <b>Skeletal</b>                     | <b>20</b> (mean SUV <sub>max</sub> 7,1 g/ml) | <b>20</b>                        | <b>sclerotic</b>             |                                        | <b>4</b>           | <b>20</b>                              |
| <b>Liver</b>                        | <b>1</b> (SUV <sub>max</sub> 14,3 g/ml)      | <b>1</b>                         | <b>hypo-attenuating mass</b> | <b>HCC</b>                             | <b>1</b>           | -                                      |
| <b>Kidney</b>                       | <b>1</b> (SUV <sub>max</sub> 14,2 g/ml)      | <b>1</b>                         | <b>heterogeneous mass</b>    | <b>RCC</b>                             | <b>1</b>           | -                                      |
| <b>Σ:</b>                           | <b>39</b>                                    | <b>39</b>                        |                              |                                        | <b>22*</b>         | <b>37</b>                              |

**Table 4** Distribution of suspected distant metastases and incidental findings.

\* Six patients with multiple sites, in total 14 with suspected distant metastases, and two with incidental findings. HCC= hepatocellular carcinoma. RCC= renal cell carcinoma.
