# Supplementary material for: 11C-acetate PET/CT in pre-therapeutic lymph node staging in high-risk prostate cancer patients and its influence on disease management - a retrospective study
Source: Springer Nature journal article supplement (doi:10.1186/s13550-014-0055-1), 2014-10-08
Supplement: MOESM10 [file 9786250]

| <u>Estimated risk</u> | <u>Addition of RT<br/>boost to pelvic LN</u> | <u>Change to<br/>no/palliative RT</u> |
|-----------------------|----------------------------------------------|---------------------------------------|
| <u>&lt;45% (n=11)</u> | <u>4</u>                                     | <u>7</u>                              |
| <u>&gt;45% (n=9)</u>  | <u>5</u>                                     | <u>4</u>                              |

**Table 6** Treatment change due to <sup>11</sup>C-acetate-PET/CT findings in estimated risk groups according to the Cagiannos nomogram.  
LN= lymph nodes.

|
